# Supplementary material for: Road traffic injuries and deaths and the achievement of UN Sustainable Development Goals in Brazil: results from the Global Burden of Disease Study, 1990 to 2019
Source: PubMed Central journal article supplement (PMC9038143; doi:10.1590/0037-8682-0261-2021), 2022-01-28
Supplement: 1678-9849-rsbmt-55-s01-e0261-2021-supp3.pdf [file 1678-9849-rsbmt-55-s01-e0261-2021-supp3.pdf]

**Supplementary Material 2** – Age-standardized mortality rates per 100,000 inhabitants, by type of road transport according to state, year and sex, GBD 2019.

| State               | Cyclist road injuries |     |      |     |      |     | Motor vehicle road injuries |      |      |      |      |      | Motorcyclist road injuries |      |      |      |      |      | Other road injuries |     |      |     |      |     | Pedestrian road injuries |      |      |      |      |      |
|---------------------|-----------------------|-----|------|-----|------|-----|-----------------------------|------|------|------|------|------|----------------------------|------|------|------|------|------|---------------------|-----|------|-----|------|-----|--------------------------|------|------|------|------|------|
|                     | 1990                  |     | 2015 |     | 2019 |     | 1990                        |      | 2015 |      | 2019 |      | 1990                       |      | 2015 |      | 2019 |      | 1990                |     | 2015 |     | 2019 |     | 1990                     |      | 2015 |      | 2019 |      |
|                     | F                     | M   | F    | M   | F    | M   | F                           | M    | F    | M    | F    | M    | F                          | M    | F    | M    | F    | M    | F                   | M   | F    | M   | F    | M   | F                        | M    | F    | M    | F    | M    |
| Brazil              | 0.2                   | 0.9 | 0.2  | 1.6 | 0.2  | 1.4 | 2.5                         | 9.6  | 3.0  | 11.2 | 2.8  | 10.2 | 1.2                        | 7.3  | 1.6  | 12.9 | 1.5  | 11.7 | 0.2                 | 0.9 | 0.1  | 0.6 | 0.1  | 0.6 | 11.0                     | 34.4 | 3.1  | 9.1  | 2.6  | 8.0  |
| Acre                | 0.2                   | 0.6 | 0.3  | 1.3 | 0.3  | 1.3 | 2.1                         | 8.0  | 2.3  | 8.7  | 2.2  | 8.4  | 1.0                        | 4.4  | 1.2  | 9.4  | 1.2  | 8.9  | 0.2                 | 0.8 | 0.1  | 0.7 | 0.1  | 0.6 | 7.6                      | 26.9 | 2.8  | 8.1  | 2.5  | 7.4  |
| Alagoas             | 0.2                   | 0.7 | 0.2  | 1.1 | 0.2  | 1.1 | 3.2                         | 13.5 | 2.6  | 12.4 | 2.5  | 11.2 | 1.3                        | 4.8  | 1.6  | 16.0 | 1.5  | 14.7 | 0.2                 | 0.8 | 0.1  | 0.8 | 0.1  | 0.8 | 14.8                     | 45.1 | 4.7  | 15.2 | 4.0  | 12.7 |
| Amapá               | 0.2                   | 0.6 | 0.4  | 1.7 | 0.4  | 1.6 | 1.2                         | 5.5  | 2.2  | 8.1  | 2.1  | 7.6  | 0.8                        | 4.1  | 1.5  | 8.4  | 1.4  | 7.7  | 0.1                 | 0.5 | 0.1  | 0.4 | 0.1  | 0.4 | 7.5                      | 25.1 | 3.6  | 10.3 | 3.2  | 9.3  |
| Amazonas            | 0.1                   | 0.3 | 0.2  | 0.7 | 0.2  | 0.7 | 1.4                         | 5.1  | 1.8  | 5.5  | 1.7  | 4.9  | 0.7                        | 3.9  | 1.3  | 8.6  | 1.1  | 7.4  | 0.1                 | 0.3 | 0.0  | 0.2 | 0.0  | 0.2 | 8.9                      | 29.4 | 3.3  | 9.5  | 2.7  | 8.2  |
| Bahia               | 0.1                   | 0.5 | 0.2  | 1.0 | 0.2  | 0.9 | 2.8                         | 11.1 | 3.1  | 13.4 | 3.0  | 12.6 | 1.1                        | 5.3  | 1.4  | 10.9 | 1.3  | 10.1 | 0.2                 | 1.0 | 0.1  | 0.8 | 0.1  | 0.8 | 7.6                      | 24.4 | 2.5  | 8.7  | 2.1  | 7.7  |
| Ceará               | 0.3                   | 1.6 | 0.3  | 2.0 | 0.3  | 2.0 | 3.0                         | 12.3 | 2.6  | 12.8 | 2.4  | 11.8 | 1.7                        | 8.2  | 2.3  | 21.1 | 2.1  | 19.3 | 0.2                 | 1.1 | 0.1  | 1.1 | 0.1  | 1.0 | 8.1                      | 28.0 | 3.8  | 13.3 | 3.1  | 11.8 |
| Distrito Federal    | 0.1                   | 1.3 | 0.1  | 2.0 | 0.1  | 1.8 | 5.7                         | 20.3 | 4.7  | 11.5 | 4.3  | 10.3 | 0.8                        | 4.6  | 0.8  | 6.1  | 0.7  | 5.2  | 0.1                 | 0.7 | 0.1  | 0.4 | 0.0  | 0.4 | 16.3                     | 48.2 | 3.1  | 8.9  | 2.5  | 7.4  |
| Espírito Santo      | 0.1                   | 0.5 | 0.2  | 1.3 | 0.2  | 1.2 | 2.3                         | 7.7  | 3.7  | 15.7 | 3.5  | 15.0 | 1.1                        | 7.0  | 1.9  | 16.7 | 1.8  | 15.4 | 0.1                 | 0.8 | 0.1  | 0.6 | 0.1  | 0.6 | 13.3                     | 42.1 | 3.7  | 10.8 | 3.1  | 9.8  |
| Goiás               | 0.2                   | 1.1 | 0.3  | 2.2 | 0.3  | 2.1 | 4.3                         | 15.1 | 4.9  | 16.3 | 4.6  | 15.0 | 1.9                        | 10.9 | 2.5  | 16.9 | 2.3  | 15.2 | 0.3                 | 1.2 | 0.1  | 0.9 | 0.1  | 0.9 | 17.9                     | 53.2 | 4.0  | 11.0 | 3.4  | 9.8  |
| Maranhão            | 0.3                   | 2.4 | 0.4  | 1.9 | 0.3  | 1.8 | 3.6                         | 21.2 | 2.8  | 10.3 | 2.6  | 9.8  | 3.7                        | 22.7 | 2.9  | 21.4 | 2.9  | 20.6 | 0.2                 | 1.4 | 0.1  | 1.0 | 0.1  | 0.9 | 7.5                      | 35.3 | 3.5  | 10.2 | 2.9  | 9.2  |
| Mato Grosso         | 0.2                   | 1.1 | 0.5  | 2.3 | 0.4  | 2.0 | 3.4                         | 13.7 | 5.1  | 17.1 | 4.7  | 15.0 | 1.5                        | 10.7 | 2.8  | 21.5 | 2.4  | 17.9 | 0.2                 | 1.5 | 0.1  | 1.1 | 0.1  | 1.1 | 10.3                     | 33.3 | 3.4  | 8.9  | 2.8  | 7.5  |
| Mato Grosso do Sul  | 0.3                   | 1.4 | 0.4  | 3.1 | 0.4  | 2.8 | 3.3                         | 9.9  | 4.4  | 12.8 | 4.0  | 11.3 | 1.4                        | 8.1  | 2.2  | 15.4 | 1.8  | 13.1 | 0.1                 | 1.2 | 0.1  | 0.8 | 0.1  | 0.7 | 11.2                     | 37.0 | 2.9  | 7.8  | 2.3  | 6.6  |
| Minas Gerais        | 0.1                   | 0.7 | 0.2  | 1.4 | 0.2  | 1.3 | 2.2                         | 7.5  | 3.9  | 14.8 | 3.6  | 13.2 | 1.0                        | 7.3  | 1.3  | 10.4 | 1.2  | 9.1  | 0.2                 | 0.9 | 0.1  | 0.6 | 0.1  | 0.6 | 10.9                     | 28.9 | 2.8  | 7.3  | 2.4  | 6.3  |
| Pará                | 0.1                   | 0.5 | 0.3  | 1.2 | 0.3  | 1.1 | 1.3                         | 5.1  | 1.7  | 7.3  | 1.7  | 6.7  | 0.8                        | 4.7  | 1.8  | 13.1 | 1.6  | 11.7 | 0.1                 | 0.7 | 0.1  | 0.7 | 0.1  | 0.7 | 10.6                     | 36.9 | 3.8  | 13.6 | 3.2  | 11.9 |
| Paraíba             | 0.2                   | 1.0 | 0.2  | 1.1 | 0.2  | 1.1 | 3.1                         | 13.2 | 2.5  | 12.5 | 2.4  | 11.5 | 1.9                        | 7.6  | 2.0  | 20.4 | 1.8  | 18.4 | 0.2                 | 0.8 | 0.1  | 0.7 | 0.1  | 0.6 | 8.1                      | 23.4 | 3.1  | 10.0 | 2.5  | 8.8  |
| Paraná              | 0.2                   | 0.9 | 0.3  | 2.3 | 0.3  | 2.1 | 2.9                         | 9.4  | 4.8  | 16.2 | 4.4  | 14.9 | 1.3                        | 7.9  | 1.9  | 13.8 | 1.6  | 12.1 | 0.2                 | 1.0 | 0.1  | 0.7 | 0.1  | 0.7 | 12.7                     | 40.9 | 3.4  | 10.1 | 2.7  | 8.8  |
| Pernambuco          | 0.1                   | 0.6 | 0.2  | 1.5 | 0.2  | 1.4 | 1.9                         | 6.7  | 2.6  | 10.2 | 2.4  | 9.7  | 0.8                        | 3.5  | 1.8  | 18.4 | 1.6  | 16.8 | 0.2                 | 0.8 | 0.1  | 0.6 | 0.1  | 0.6 | 11.2                     | 38.6 | 3.4  | 10.9 | 2.8  | 10.1 |
| Piauí               | 0.3                   | 2.2 | 0.3  | 2.7 | 0.3  | 2.5 | 2.9                         | 11.2 | 2.7  | 9.8  | 2.6  | 8.6  | 2.5                        | 11.9 | 3.3  | 35.1 | 3.0  | 29.3 | 0.1                 | 1.1 | 0.1  | 0.8 | 0.1  | 0.8 | 7.8                      | 23.8 | 2.9  | 8.8  | 2.4  | 7.5  |
| Rio de Janeiro      | 0.1                   | 0.9 | 0.2  | 1.4 | 0.2  | 1.3 | 1.7                         | 5.8  | 2.2  | 7.2  | 2.1  | 6.9  | 1.0                        | 5.3  | 1.2  | 9.0  | 1.1  | 8.2  | 0.1                 | 0.6 | 0.1  | 0.5 | 0.1  | 0.5 | 13.0                     | 40.7 | 3.6  | 10.0 | 3.2  | 9.2  |
| Rio Grande do Norte | 0.1                   | 0.7 | 0.2  | 1.4 | 0.2  | 1.3 | 2.5                         | 11.8 | 2.3  | 9.2  | 2.1  | 9.1  | 1.1                        | 5.8  | 1.6  | 14.6 | 1.4  | 13.7 | 0.2                 | 0.8 | 0.1  | 0.6 | 0.1  | 0.6 | 8.0                      | 27.6 | 2.2  | 7.2  | 1.8  | 6.8  |
| Rio Grande do Sul   | 0.1                   | 0.5 | 0.2  | 1.2 | 0.2  | 1.1 | 2.7                         | 10.3 | 3.1  | 11.0 | 3.0  | 10.3 | 0.9                        | 5.9  | 1.2  | 8.4  | 1.2  | 7.7  | 0.1                 | 0.7 | 0.1  | 0.5 | 0.1  | 0.5 | 7.1                      | 20.8 | 2.5  | 6.5  | 2.2  | 5.9  |
| Rondônia            | 0.2                   | 1.0 | 0.4  | 2.4 | 0.4  | 2.2 | 3.0                         | 12.4 | 3.8  | 15.3 | 3.6  | 14.2 | 1.7                        | 10.5 | 3.0  | 22.6 | 2.6  | 20.8 | 0.2                 | 1.3 | 0.1  | 1.2 | 0.1  | 1.2 | 11.9                     | 38.5 | 3.5  | 10.7 | 2.8  | 9.4  |
| Roraima             | 0.5                   | 3.1 | 0.8  | 5.5 | 0.7  | 5.4 | 4.3                         | 14.1 | 4.6  | 12.8 | 4.5  | 12.6 | 2.3                        | 12.9 | 2.6  | 19.8 | 2.6  | 18.6 | 0.1                 | 0.9 | 0.1  | 0.6 | 0.1  | 0.6 | 9.5                      | 36.0 | 2.6  | 8.2  | 2.3  | 7.6  |
| Santa Catarina      | 0.3                   | 1.5 | 0.5  | 2.6 | 0.4  | 2.4 | 5.3                         | 20.0 | 4.9  | 15.2 | 4.7  | 14.1 | 1.3                        | 10.0 | 1.9  | 14.3 | 1.8  | 13.0 | 0.1                 | 0.8 | 0.1  | 0.4 | 0.1  | 0.4 | 12.6                     | 36.7 | 2.7  | 6.9  | 2.3  | 6.3  |
| São Paulo           | 0.1                   | 0.8 | 0.2  | 1.2 | 0.2  | 1.1 | 1.7                         | 6.8  | 2.1  | 7.8  | 2.0  | 7.0  | 1.0                        | 7.2  | 1.2  | 8.7  | 1.1  | 7.7  | 0.2                 | 0.8 | 0.1  | 0.4 | 0.1  | 0.4 | 12.5                     | 39.1 | 2.7  | 7.8  | 2.3  | 6.7  |
| Sergipe             | 0.1                   | 1.3 | 0.1  | 2.3 | 0.1  | 2.1 | 3.3                         | 12.0 | 3.0  | 11.4 | 2.8  | 10.7 | 1.4                        | 6.8  | 1.8  | 22.3 | 1.7  | 19.7 | 0.2                 | 1.3 | 0.1  | 0.9 | 0.1  | 0.9 | 11.5                     | 42.3 | 2.8  | 9.6  | 2.4  | 8.7  |
| Tocantins           | 0.5                   | 2.4 | 0.5  | 3.0 | 0.5  | 3.0 | 6.9                         | 23.4 | 5.5  | 18.6 | 5.1  | 17.7 | 3.0                        | 10.6 | 3.3  | 21.0 | 3.0  | 20.3 | 0.2                 | 1.8 | 0.1  | 1.4 | 0.1  | 1.3 | 7.7                      | 24.0 | 2.9  | 9.4  | 2.5  | 8.5  |
