# Supplementary material for: Road traffic injuries and deaths and the achievement of UN Sustainable Development Goals in Brazil: results from the Global Burden of Disease Study, 1990 to 2019
Source: PubMed Central journal article supplement (PMC9038143; doi:10.1590/0037-8682-0261-2021), 2022-01-28
Supplement: 1678-9849-rsbmt-55-s01-e0261-2021-supp4.pdf [file 1678-9849-rsbmt-55-s01-e0261-2021-supp4.pdf]

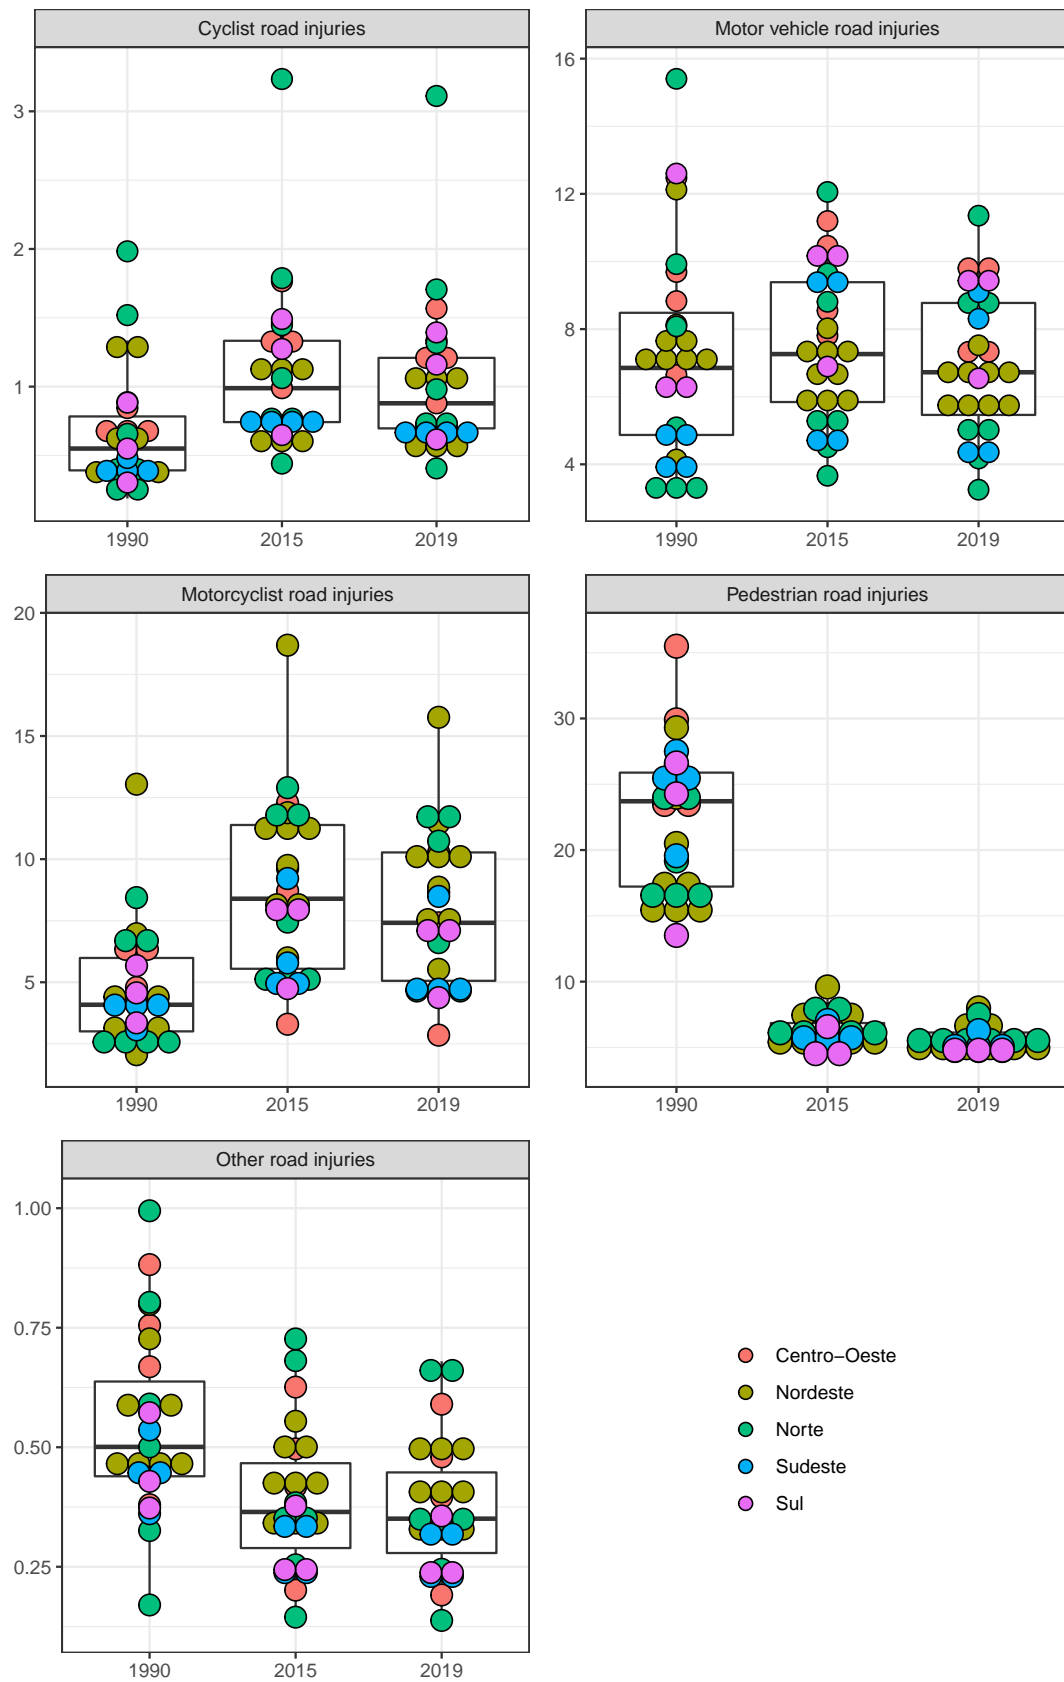

**Supplementary Material 3** - Age-standardized mortality rates by type of road transport per 100,000 inhabitants, both sexes, according to the region of Brazil and year, GBD 2019.
